# The high-throughput gene prediction of more than 1,700 eukaryote genomes using the software package EukMetaSanity

Christopher J. Neely<sup>1,\*</sup>, Sarah K. Hu<sup>2</sup>, Harriet Alexander<sup>3</sup>, and Benjamin J. Tully<sup>4,5,\*</sup>

<sup>1</sup>University of Southern California, Department of Quantitative and Computational Biology, Los Angeles, 90089, USA

<sup>2</sup>Marine Chemistry and Geochemistry, Woods Hole Oceanographic Institution, Woods Hole, MA, USA, 02543

<sup>3</sup>Biology Department, Woods Hole Oceanographic Institution, Woods Hole, MA, USA, 02543

<sup>4</sup>University of Southern California, Wrigley Institute for Environmental Studies, Los Angeles, 90089, USA

<sup>5</sup>University of Southern California, Center for Dark Energy Biosphere Investigations, Los Angeles, 90089, USA

\* [cjneely10@gmail.com](mailto:cjneely10@gmail.com); [tully.bj@gmail.com](mailto:tully.bj@gmail.com)

## Abstract

1 Gene prediction and annotation for eukaryotic genomes is challenging with large data demands and  
2 complex computational requirements. For most eukaryotes, genomes are recovered from specific tar-  
3 get taxa. However, it is now feasible to reconstruct or sequence hundreds of metagenome-assembled  
4 genomes (MAGs) or single-amplified genomes directly from the environment. To meet this forth-  
5 coming wave of eukaryotic genome generation, we introduce EukMetaSanity, which combines state-  
6 of-the-art tools into three pipelines that have been specifically designed for extensive parallelization  
7 on high-performance computing infrastructure. EukMetaSanity performs an automated taxonomy  
8 search against a protein database of 1,482 species to identify phylogenetically compatible proteins  
9 to be used in downstream gene prediction. We present the results for intron, exon, and gene locus  
10 prediction for 112 genomes collected from NCBI, including fungi, plants, and animals, along with  
11 1,669 MAGs and demonstrate that EukMetaSanity can provide reliable preliminary gene predictions  
12 for a single target taxon or at scale for hundreds of MAGs. EukMetaSanity is freely available at  
13 <https://github.com/cjneely10/EukMetaSanity>.

## 14 Main

15 Until recently, the large-scale annotation of eukaryotic genomes has not been a major requirement  
16 or consideration for the tools and pipelines built to perform aspects of gene prediction. This is a  
17 logical status of the state of the field as standard eukaryotic genomics requires a target organism of  
18 interest and extensive financial and data investments for sequencing, both for chromosome construc-  
19 tion (*i.e.*, DNA-centric) and gene locus prediction (*i.e.*, RNA-centric) (Xu et al., 2020; Mock et al.,  
20 2017; Shoguchi et al., 2018; Li et al., 2018; Leclère et al., 2019). However, with the maturation of  
21 the large-scale recovery of eukaryotic metagenomic-assembled genomes (MAGs) (Alexander et al.,  
22 2021; Delmont et al., 2021; Duncan et al., 2020; West et al., 2018), the steps for accurately predicting  
23 gene loci needs to shift from current methods that typically focus on a single genome to an approach  
24 that can be readily parallelized to annotate hundreds or thousands of genomes.

25 As techniques such as metagenomics and single-cell amplified genomics more frequently provide  
26 environmental eukaryotic genomes without the presence of accompanying expression data, accurate  
27 gene identification using *ab initio* predictions and protein evidence will be required to leverage the  
28 information stored therein. Without the aid of expression data, gene locus prediction is computa-  
29 tionally complex and requires two major steps: (1) repeat identification/masking and (2) exon-intron  
30 boundary identification (Faure et al., 2021; Salzberg, 2019; Danchin et al., 2018; Yandell and Ence,  
31 2012). Both of these steps can be performed by a number of tools/pipelines built to support specific  
32 tasks, each with nuances in runtime, input requirements, and user supervision (Bruna et al., 2020;  
33 Lomsadze et al., 2005, 2014; Stanke et al., 2006; Hoff and Stanke, 2013; Hoff et al., 2015; Bruna  
34 et al., 2021; Levy Karin et al., 2020; Holt and Yandell, 2011; Cantarel et al., 2008). These tasks  
35 can also be expedited if suitably close phylogenetic neighbors can be identified to assist in evidence  
36 supported prediction(s) (West et al., 2018). Execution times for these steps in a typical eukaryotic an-  
37 notation pipeline can add hours or days to the total runtime needed to properly identify genes, making  
38 large-scale annotation projects difficult to plan and manage.

39 Here, we present EukMetaSanity, a workflow package that combines crucial steps for accurate gene  
40 loci prediction without gene expression data, while also providing downstream avenues for protein  
41 annotation and gene refinement through the use of expression data when available (RNA-seq or tran-  
42 scriptomes). EukMetaSanity combines a number of tools and tasks into a single unified package that  
43 is easily deployable in different compute environments. The flexibility of EukMetaSanity is built into  
44 the application programming interface (API) that allows end-users to select the tools and databases  
45 relevant to their questions, but also for rapid incorporation of new tools and high-level paralleliza-  
46 tion on high performance computing (HPC) systems that support Simple Linux Utility for Resource  
47 Management (SLURM) (Yoo et al., 2003).

48 The overarching workflow for genome annotation is split into three distinct components - *Run*, *Report*,  
49 and *Refine* (Figure 1). We will discuss below the details of the *Run* pipeline, prioritized with accurate  
50 identification of gene loci and exon-intron boundaries. Both the *Report* and *Refine* pipelines accept the  
51 genes predicted in the *Run* pipeline in order to perform protein annotation and gene locus refinement,  
52 respectively, using the same overall parallelization techniques. The *Report* pipeline annotates proteins  
53 identified in the *Run* or *Refine* pipelines using established databases and tools such as MMseqs2  
54 (Steinegger and Söding, 2017), KofamScan (Aramaki et al., 2019), and eggNOG (Huerta-Cepas et al.,  
55 2018), while the *Refine* pipeline accepts RNA-seq and/or transcriptome data that can be mapped to

56 genomes using Hisat2 (Kim et al., 2019) and GMAP (Wu and Watanabe, 2005), respectively, and  
 57 used in locus boundary refinement with BRAKER2 (Bruna et al., 2021). The implementation of the  
 58 tools in the *Report* and *Refine* pipelines does not deviate from prescribed methodologies and accepts  
 59 all user-defined parameters from the source programs.

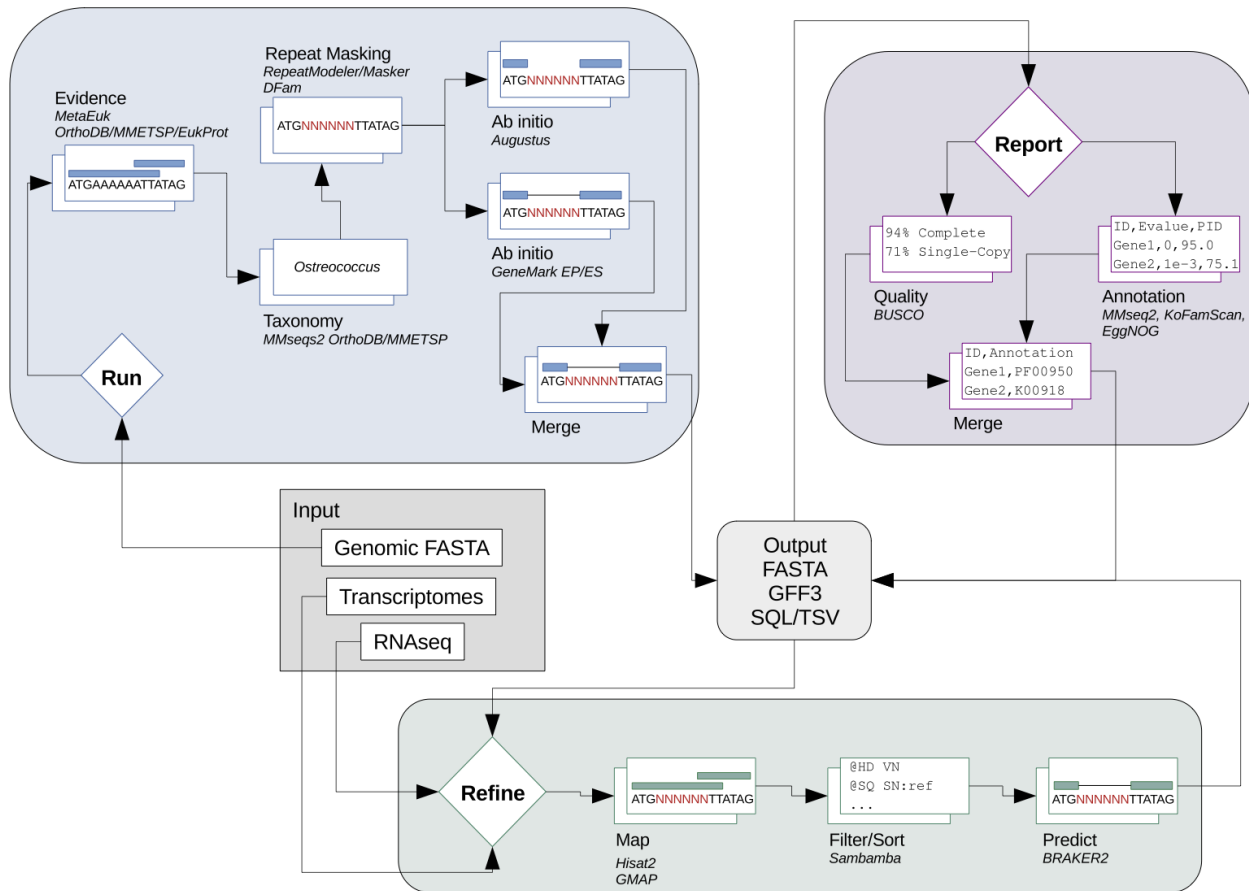

**Figure 1: Schematic of the three EukMetaSanity pipelines: *Run*, *Report*, and *Refine*.**

60 Herein, we will detail the performance of the *Run* pipeline, which automates gene locus prediction.  
 61 The first priority of the *Run* pipeline is the determination of an approximate NCBI taxonomic assign-  
 62 ment for the genome of interest, as this assignment will inform repeat masking and the proteins used  
 63 as evidential support in gene prediction. This assignment is completed on a first-pass set of protein  
 64 predictions that are generated by the program MetaEuk (Levy Karin et al., 2020). The MMseqs2  
 65 taxonomy subcommand compares the input genome against a modified database that contains the Or-  
 66 thologous Database of Proteins (OrthoDB;  $n = 1,271$  eukaryotic genomes) (Kriventseva et al., 2019)  
 67 and the Marine Microbial Eukaryotic Transcriptome Sequencing Project (MMETSP;  $n = 719$  tran-  
 68 scriptomes) (Keeling et al., 2014). The combined OrthoDB-MMETSP database provides extended  
 69 coverage beyond laboratory cultivars and macrofauna to include environmental eukaryotes, specifi-  
 70 cally emphasizing marine protists. The combined dataset encompasses 1,482 species and provides  
 71 representatives for 352 Orders in 127 Classes (overlap determined using <https://github.com/>

72 frallain/NCBI\_taxonomy\_tree/pull/1). For reasons discussed below, these databases were se-  
73 lected due to their use of the NCBI taxonomy ID (taxid) ontology schema, which provides the ability  
74 to extract related organisms based on a shared identifier. Additional databases that use the NCBI taxid  
75 can be easily incorporated to expand the breadth of the databases packaged with EukMetaSanity, but  
76 databases that lack this shared ontology (Niang et al., 2020; Richter et al., 2020) would require mod-  
77 ification in their corresponding taxonomy schema or integration into steps further downstream in the  
78 *Run* pipeline than currently implemented.

79 When an appropriate NCBI taxonomy can be identified, genomes undergo repeat identification and  
80 masking using RepeatMasker (Smit et al., 2013) which uses the Family- or Superfamily-level NCBI  
81 taxid to select repeat models from the DFam library (Hubley et al., 2016). Repeats are also masked  
82 in an *ab initio* fashion using RepeatModeler2 (Flynn et al., 2020), which runs multiple iterations  
83 of repeat identification and refinement to generate repeat families that inform the masking step in  
84 RepeatMasker. Taxonomic information is then used to select all relevant proteins from the OrthoDB-  
85 MMETSP database that match at least the Order-level predicted assignment. These proteins are used  
86 as inputs in gene prediction for GeneMark-EP (Bruna et al., 2020). Should a suitable Order-level  
87 assignment be unavailable or GeneMark ProTHint fail to predict intron boundaries, the annotation  
88 step defaults to GeneMark-ES (Lomsadze et al., 2005) to perform *ab initio* prediction. Additionally,  
89 we automate the first round of Augustus (Stanke et al., 2006) training by searching the input genome  
90 against the OrthoDB-MMETSP database with the MMseqs2 subprogram `linsearch` and, for the  
91 60 models in the Augustus species database, select the model with the highest scoring `linsearch`  
92 match. Predicted gene loci from all three annotation tools (GeneMark-EP/ES, Augustus, MetaEuk)  
93 are directly available, but, additionally, EukMetaSanity can combine multiple annotation tracks to  
94 provide gene loci approximations that capture all non-overlapping recovered loci (Tier 1), gene loci  
95 supported by two tools (Tier 2), or only gene loci supported by all three tools (Tier 3; Figure S1).

96 To explore how reliable the EukMetaSanity *Run* pipeline was in returning accurate gene predictions,  
97 multiple experiments were conducted using high-quality genomes with accompanying gold standard  
98 annotations from the NCBI Reference Sequence (RefSeq) and GenBank databases, as well as per-  
99 forming comparisons between the methodologies used to predict genes in environmentally derived  
100 MAGs. To illustrate that the protein evidence methodology used by EukMetaSanity can recapitulate  
101 the gene content of gold standard eukaryote genomes, 102 genomes were selected from the NCBI  
102 RefSeq database plus an additional set of 10 genomes tested using BRAKER2 (Bruna et al., 2021)  
103 and the recently released platypus genome (Zhou et al., 2021). The 112 genomes were selected to  
104 provide representatives from a phylogenetically diverse set of organisms with a range of overall ge-  
105 nomic complexity and size, ranging from unicellular algae (*Guillardia theta*, 55.1Mbp) (Curtis et al.,  
106 2012) to the platypus (*Ornithorhynchus anatinus*, 1.86Gbp; Supplemental Data 1).

107 To our knowledge, this is the first time that a comparison has been made for 100+ eukaryote genomes  
108 using these three annotation approaches, with previous assessments ranging from 7-12 genomes (Levy  
109 Karin et al., 2020; Bruna et al., 2021; Banerjee et al., 2021). This computationally intensive task  
110 (18,461 CPU hrs for 48 genomes with length 100-400 Mbp; 8,879 CPU hours for 14 genomes  $\geq$ 400  
111 Mbp) is achieved in relatively short time-scales through the aggressive use of parallelization and  
112 optimization by EukMetaSanity to manage the resources distributed to compute nodes on an HPC  
113 system (Figure S2; Supplemental Data 2).

114 For the three gene prediction software suites used to analyze the NCBI genome set, BUSCO (Seppey

115 et al., 2019) completion scores were used to estimate the impact on genome annotation (Supplemental  
116 Data 1). Genomes annotated with the GeneMark-EP program (Bruna et al., 2020) produced a  
117 distribution of identified BUSCO completion estimates that were not significantly different from the  
118 reference set ( $p_{\text{BH-FDR}} = 0.3553$ ; Wilcoxon rank-sum). When compared to the reference annotation,  
119 the GeneMark-EP annotation resulted in a median decrease of five identified BUSCO proteins, while  
120 the median decrease for identified BUSCO proteins for Augustus (Stanke et al., 2006) and MetaEuk  
121 Levy Karin et al. (2020) was 70 and 110, respectively (Figure 2A). GeneMark-EP and MetaEuk  
122 over-predicted the total number of proteins in the dataset by 16.4% and 72.2%, respectively, while  
123 Augustus under-predicted the total number of proteins by 36.2% (Figure 2A). Combining annotation  
124 tracks using the Tier 1 criteria resulted in a final gene track which benefited from the initial high-  
125 scoring GeneMark-EP annotation set and which incorporates additional gene loci identified either by  
126 MetaEuk or Augustus, resulting in a median decrease of four BUSCO proteins when compared to  
127 the reference and an over-prediction of 65.7% of the total number of proteins (Figure 2A). Tier 1  
128 predictions resulted in the smallest number of genomes that had lower BUSCO completeness, and  
129 was able to return the same completeness score or higher for 50.0% of the genomes. Collectively,  
130 the GeneMark-EP and Tier 1 approach performed well in minimizing the number of BUSCO proteins  
131 lost during gene prediction; however, both methods over-predict the number of detected genes. The  
132 high degree of over prediction in the Tier 1 approach is to be expected as it combines results from  
133 all three tools, substantially increasing the number of false positives. As an alternative approach, the  
134 EukMetaSanity Tier 2 method outputs genes that are supported by at least two lines of evidence. With  
135 the Tier 2 criteria, the number of genomes that lost BUSCO proteins increased, but this loss of true  
136 positives is offset by a drastic decrease in potential false positives (Tier 2 under-predicts total proteins  
137 by 6.3%; Figure S3). The use of either GeneMark-EP, Tier 1, or Tier 2 outputs depends on the goal  
138 of the researcher to maximize sensitivity (Tier 1) or precision (Tier 2; Figure S3).

139 To assess the recovery at the individual gene loci level, the program GffCompare (Pertea and Pertea,  
140 2020) was used to perform a stringent comparison between the EukMetaSanity output and the NCBI  
141 reference (Supplemental Data 1). GffCompare uses stringent cutoffs in its assignment of true positives  
142 (TP), false positives (FP), and false negatives (FN) that require exact coordinate matches for features  
143 (*i.e.*, base-, exon-, intron-, and locus-level), and allows for no more than a 100-base difference at the  
144 ends of exons when assessing locus-level accuracy. We found that each of the programs used in Euk-  
145 MetaSanity achieved median sensitivity and precision values  $> 59.0\%$  in the NCBI dataset when con-  
146 sidering base-level matches (total number of bases assigned to an exon at the same coordinate), with  
147 the Tier 1 approach and GeneMark-EP scoring the highest base-level sensitivity (86.2% and 84.2%,  
148 respectively) and precision scores (83.8% and 89.5%, respectively; Figure 2B-E). Key differences in  
149 each program are apparent in the annotation quality with respect to accurate identification of exon  
150 and intron feature levels. While both features retained median sensitivity and precision  $> 59\%$  for  
151 GeneMark-EP and Tier 1 predictions, MetaEuk saw median sensitivity and precision scores of 4.7%  
152 and 10.2%, respectively, for exon recovery, and 0.9% and 9.5%, respectively, for intron recovery (Fig-  
153 ure 2B). For Augustus, the median sensitivity and precision were 23.1% and 42.3%, respectively, for  
154 exon recovery, and 27.8% and 51.2%, respectively, for intron recovery (Figure 2C). The median per-  
155 centages for unannotated gene loci for MetaEuk, Augustus, GeneMark, and Tier 1 predictions were  
156 19.2%, 25.5%, 11.1%, and 7.4%, respectively (Figure 2B-E). These results demonstrate that even  
157 when considering the strict cutoffs used by GffCompare, GeneMark-EP and the Tier 1 output are  
158 able to produce high accuracy annotation predictions that recover  $\sim 90\%$  of the previously annotated



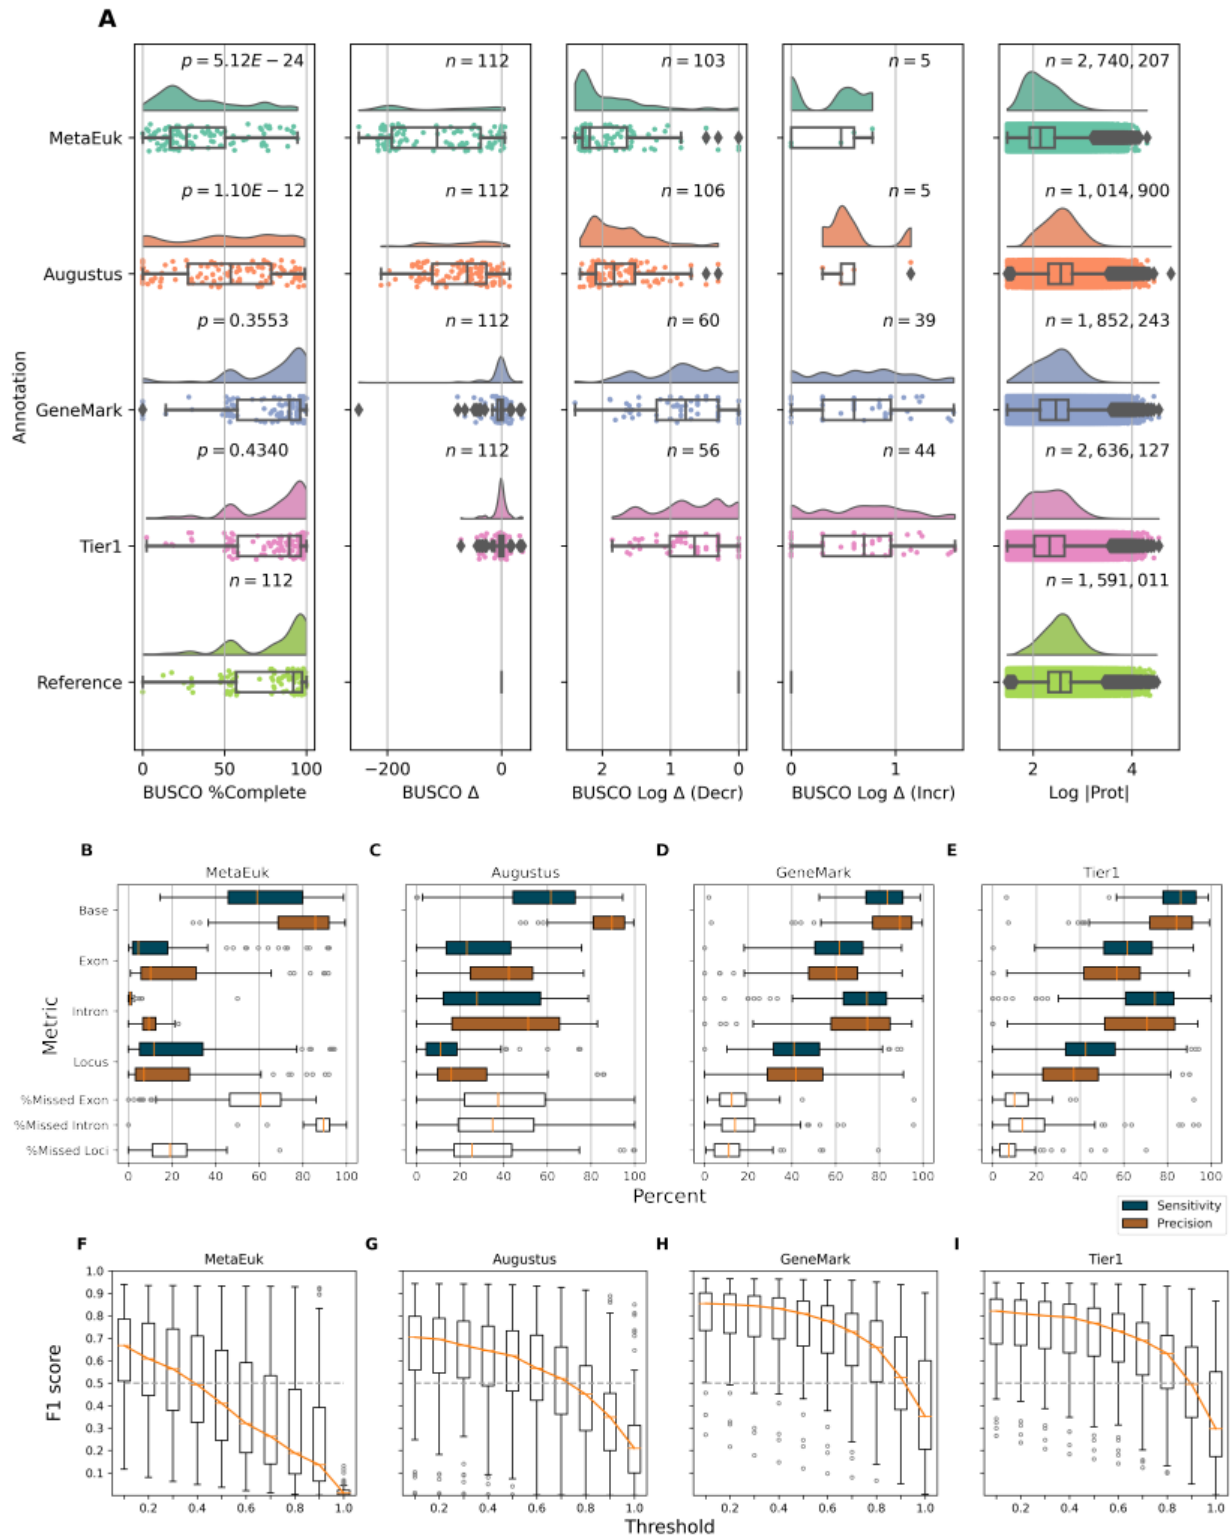

Figure 2: [Continued on next page.]

**Figure 2: Comparison of EukMetaSanity results to NCBI provided annotations for 112 genomes.** (A) Box plots comparing BUSCO completeness and protein prediction results for the three gene prediction tools and Tier 1 approach against the NCBI reference ( $n = 112$ ). From left to right: Panel 1 - BUSCO completeness for each genome.  $p$ -value for Wilcoxon ranked sum with Benjamini-Hochberg false discovery correction. Panel 2 - The total number of BUSCO proteins lost/gained for each genome. Panel 3 - The log decrease in BUSCO proteins. Panel 4 - The log increase in BUSCO proteins. Panel 5 - Log size of proteins recovered. (B-E) Box plots comparing GffCompare results for the three gene prediction tools and Tier 1 approach. Sensitivity and precision calculated as  $S = TP/(TP + FN)$  and  $P = TP/(TP + FP)$ , respectively. %Missed Exon, Intron, and Locus indicates that value not recovered by the associated method. (F-I) Box plots comparing LocusCompare results for the three gene prediction tools and Tier 1 approach.  $F1 = 2 \times (S \times P)/(S + P)$

159 loci.

160 At locus-level resolution, GffCompare results provide a perspective that relies on exact boundary  
161 accuracy of all introns. We performed a complimentary assessment to compare the degree to which  
162 gene content is captured, but for which intron structure may be incorrect. This method, which we call  
163 LocusCompare, identifies the degree to which a predicted gene overlaps a reference gene loci (*i.e.*,  
164 length of prediction-reference overlap divided by the length of the reference; Figure S4). TP, FP, and  
165 FN are determined using a sliding scale of threshold cutoffs (0.1 - 1.0) that reflects the proportion  
166 of the reference locus that is recovered (*e.g.*, a threshold value of 0.1 indicates a predicted gene  
167 overlaps at least 10% of the reference gene at a locus position and 1.0 represents an overlap of the  
168 exact length, or greater, of the reference gene; Figure S4; Supplemental Data 1). GeneMark-EP  
169 and Tier 1 predictions retained median F1 scores  $\geq 0.5$  for LocusCompare threshold values  $\leq 0.9$   
170 (Figure 2F-G), while MetaEuk and Augustus F1 scores dropped  $< 0.5$  at lower threshold values  
171 ( $\leq 0.4$  and  $\leq 0.7$ , respectively; Figure 2H-I; Supplemental Data 3). The GeneMark-EP and Tier 1  
172 results indicate that, for many genes predicted by EukMetaSanity, the recovered genes are at least  
173 90% of target gene length. And, while Tier 1 predicts a larger number of total proteins, this does not  
174 result in a large decrease in F1 scores when compared to GeneMark-EP. These results suggest that  
175 EukMetaSanity functions well when the status about the presence/absence of a protein is important,  
176 for example interpreting metabolic potential from a large MAG dataset (as in Alexander *et al.* 2021).  
177 A fraction of a loci, when translated to protein, may be suitable for detecting a gene despite inexact  
178 intron boundaries, and may yield results that can be explored further with the databases provided in  
179 the *Report* pipeline. We do not recommend the use of the EukMetaSanity *Run* pipeline alone if the  
180 goal is to determine exact intron-exon boundaries, which will still require additional transcript-level  
181 support.

182 From the larger overall analysis of 112 NCBI genomes, here we highlight 11 particularly relevant  
183 bellwether examples that underscore the advantages and limitations of EukMetaSanity for plant and  
184 animal taxa. For these taxa, EukMetaSanity was effectively able to recover a large percentage of the  
185 known gene loci (Figure S5). In this subset, the Tier 1 and Tier 2 approaches recovered BUSCO  
186 scores that differed by  $< 3.6\%$  from each other, with the exception of the platypus genome. In these  
187 instances, the Tier 2 approach showed marked increase in F1 scores across all thresholds, as well as an  
188 increase in sensitivity and precision metrics at the base-, exon-, intron-, and locus-levels (Supplemen-

189 tal Figure 6F & 6K). The Tier 1 approach overestimated the number of recovered gene loci (760,818  
190 predicted genes vs 384,839 reference genes), but the Tier 2 approach acted as a useful filter to re-  
191 move false positives, pseudo-genes, and other spurious ORFs that are not supported by at least two  
192 annotation programs (349,810 predicted genes; Figure S5). The only exception to this was the *Or-*  
193 *nithorhynchus anatinus* (platypus) genome, which exemplifies an instance when *ab initio* prediction  
194 is superior to protein evidence supported predictions. There are only 18,894 proteins in the OrthoDB-  
195 MMETSP from the Order *Monotremata*, which come from organisms other than *O. anatinus* (*i.e.*,  
196 echidnas). In comparison, the platypus has 38,847 annotated genes. In this instance, *ab initio* pre-  
197 diction through Augustus was successful in recovering a large fraction of the expected genes (70.2%  
198 BUSCO completeness; Supplemental Data 1) compared to gene predictions that included protein ev-  
199 idence (7.5% and 0% BUSCO completeness for MetaEuk and GeneMark-EP, respectively). The lack  
200 of sufficient representation in the OrthoDB-MMETSP database drastically decreases the likelihood  
201 that protein evidence-based gene prediction software can accurately resolve gene loci in this newly  
202 sequenced mammal species.

203 To further explore the impact of a lack of closely related organisms in the taxonomic database on gene  
204 prediction results for novel environmental organisms, we artificially removed a selection of organisms  
205 from the OrthoDB-MMETSP database prior to gene prediction. From NCBI RefSeq, we identified 34  
206 fungal genomes (assigned to the Kingdom Fungi) from 15 different Orders and created 15 modified  
207 OrthoDB-MMETSP databases, each depleted of proteins from the corresponding fungal Order (Sup-  
208 plemental Data 4). These results recapitulate those reported using the NCBI gold standard genomes:  
209 GeneMark-EP and the Tier 1 were superior in recovering predicted gene loci compared to Augustus  
210 and MetaEuk (Figure 3; Figures S6 and S7). Exploring the results from GeneMark-EP, there was  
211 no statistical difference between the BUSCO completeness for genomes when using the full database  
212 versus the database depleted of genomes sharing the same Order ( $p_{\text{BH-FDR}} = 0.849$ ; Wilcoxon rank  
213 sum; Figure 3). For the GeneMark-EP output, we did see slight decreases in precision and sensitivity  
214 for most of the categories assessed using GffCompare and slight increases in the percent exons, in-  
215 trons, and loci missed in the annotation step. The total number of proteins recovered increased when  
216 using the depleted database (+42,850 proteins), while the average protein length decreased (-7 amino  
217 acids), suggesting that at least some of the gene loci were being unintentionally split when using a  
218 more distantly related protein set as evidence (Table S1). On an approach-by-approach basis, there  
219 was a trend of similar BUSCO completeness values and LocusCompare F1 scores when comparing  
220 the full versus depleted databases, though the values for MetaEuk and Augustus were substantially  
221 lower (Figure 3; Figure S7; Supplemental Data 5). The results from this assessment indicate that the  
222 method implemented by EukMetaSanity can be used to provide gene annotations for genomes even  
223 when near neighbors within the same Order are not available. In this instance, the presence of related  
224 Orders in the database acted as a bridge to provide sufficient information to recover quality gene an-  
225 notations. For organisms that lack representation at the Class or Phylum level, the lack of reference  
226 proteins will undoubtedly have an impact on gene recovery. EukMetaSanity is designed to handle  
227 these cases by defaulting to the GeneMark-ES implementation and providing an output like the Tier 2  
228 approach which can return putative gene loci supported by at least two of provided annotation tools,  
229 affording added confidence in the final annotation set, as well as decreasing the total false positive  
230 protein predictions that are included (Figure S3). As the data illustrates, this approach is also useful  
231 for more complex organisms.

232 After establishing the functionality of EukMetaSanity on the benchmark datasets above, we applied



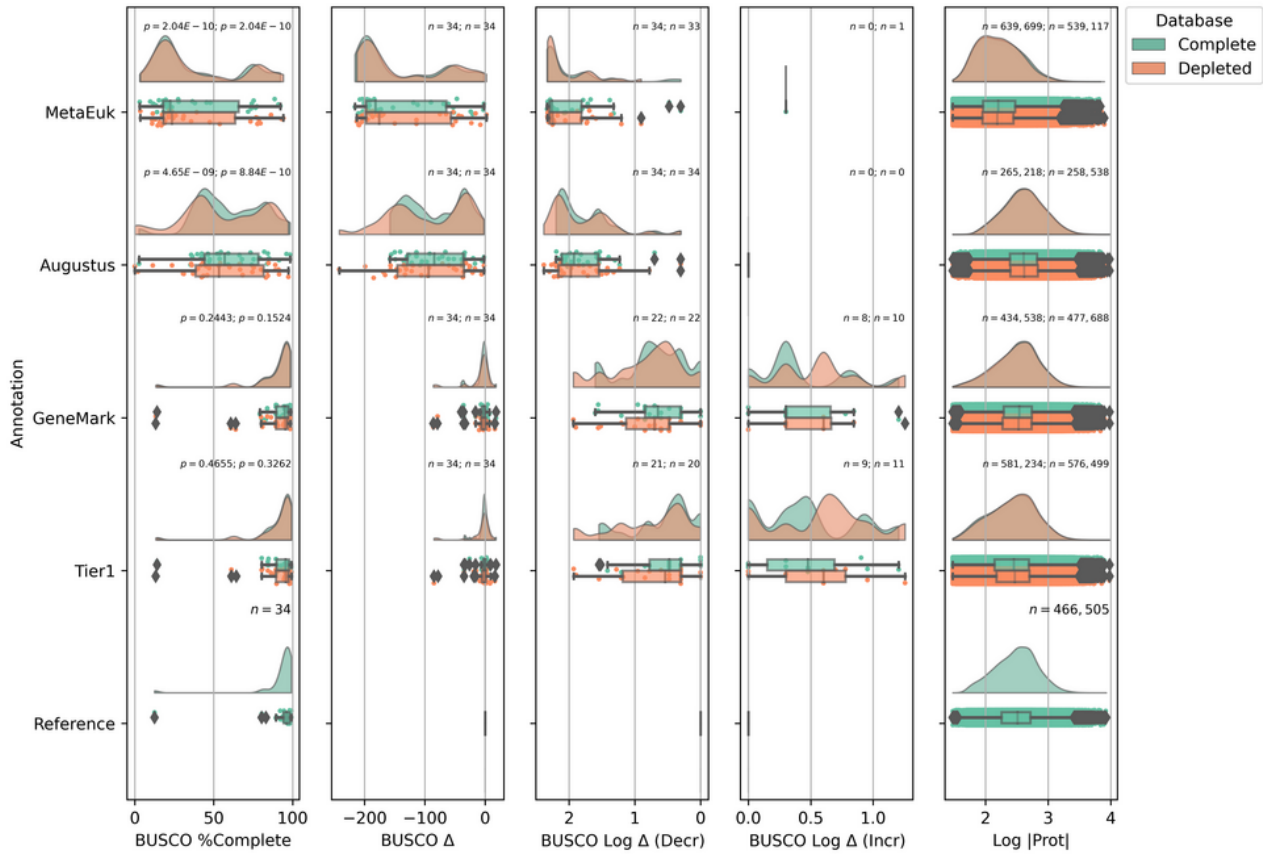

**Figure 3: Reliability of EukMetaSanity using Order-level depleted databases for 34 fungal genomes in 15 Orders.** Box plots comparing BUSCO completeness and protein prediction results for the three gene prediction tools and Tier 1 approach against the NCBI reference ( $n = 34$ ) for the complete OrthoDB-MMETSP database (green) and depleted database lacking the associated Order-level set of proteins (orange). From left to right: Panel 1 - BUSCO completeness for each genome.  $p$ -value for Wilcoxon ranked sum with Benjamini-Hochberg false discovery correction. Panel 2 - The total number of BUSCO proteins lost/gained for each genome. Panel 3 - The log decrease in BUSCO proteins. Panel 4 - The log increase in BUSCO proteins. Panel 5 - Log size of proteins recovered.

233 the *Run* pipeline to two sets of marine, eukaryotic MAGs reconstructed from the *Tara* Oceans large  
 234 size fraction metagenomic datasets (Supplemental Data 6-7) (Carradec et al., 2018). Here we high-  
 235 light the impact of applying EukMetaSanity gene prediction compared to two different approaches  
 236 used by the authors. As no “gold standard” annotation exists for the recovered MAGs, our intentions  
 237 were to compare the results provided by EukMetaSanity to the methodologies initially used in gene  
 238 annotation.

239 Delmont *et al.* (2021) reconstructed 682 eukaryotic MAGs and performed annotation using a pro-  
 240 tocol that included protein mapping against the Uniref90 and METdb (Niang et al., 2020) databases  
 241 with splice aware mapping, *ab initio* predictions using Augustus, and a mapping step that used 905  
 242 metatranscriptome assemblies (Pesant et al., 2015). While the specific approaches to protein map-  
 243 ping differ, the overall concept was conserved between the Delmont *et al.* (2021) methodology and

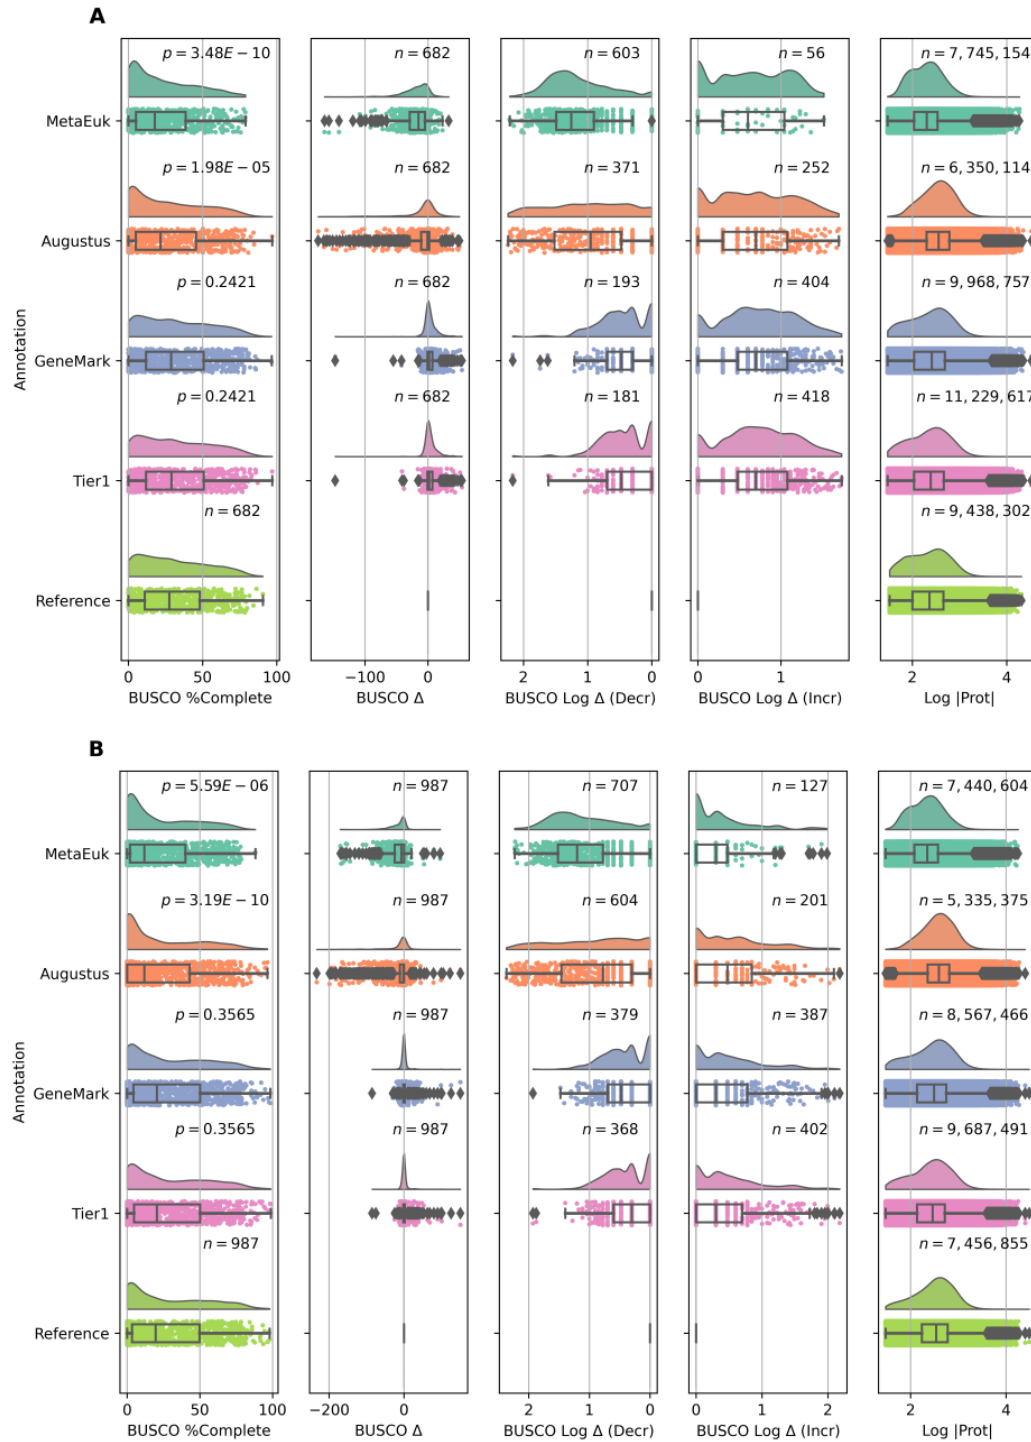

**Figure 4: Comparison of EukMetaSanity results to alternative annotation pipelines used for Tara Oceans MAGs.** (A) MAGs from Delmont *et al.* (2021) ( $n = 682$ ). (B) MAGs from Alexander *et al.* (2021) ( $n = 987$ ). From left to right: Panel 1 - BUSCO completeness for each genome.  $p$ -value for Wilcoxon ranked sum with Benjamini-Hochberg false discovery correction. Panel 2 - The total number of BUSCO proteins lost/gained for each genome. Panel 3 - The log decrease for genomes that lost BUSCO proteins. Panel 4 - The log increase for genomes that gained BUSCO proteins. Panel 5 - Log size of proteins recovered.

244 the approach implemented by EukMetaSanity (*i.e.*, providing useful protein evidence to downstream  
245 processes). However, the metatranscriptome mapping is a time and computationally intensive step  
246 (682 MAGs  $\times$  905 metatranscriptomes), where the total *Tara* Oceans metatranscriptome dataset to-  
247 tals  $\sim$ 11TB of data. Additionally, no repeat modeling or masking was conducted as part of the initial  
248 protocol. Within EukMetaSanity, GeneMark-EP and the Tier 1 results generated BUSCO comple-  
249 tion estimates that were not significantly different from the completion estimates from the Delmont  
250 *et al.* (2021) protocol ( $p_{\text{BH-FDR}} = 0.2421$ ; Wilcoxon rank-sum; Figure 4A). The Tier 1 approach in-  
251 creased the number of identified BUSCO proteins in over 62% of the processed MAGs by a median  
252 of five additional BUSCO proteins per MAG. For the less than 48% of MAGs that saw a decrease  
253 in BUSCO proteins, the median number of BUSCO proteins lost was three (Figure 4A). The Tier 1  
254 approach increased the total number of identified proteins in the complete dataset by 19% (compar-  
255 atively, GeneMark-EP identified 6% more proteins; Figure 4A). Both MetaEuk and Augustus under-  
256 predicted the number of genes in the MAG dataset and produced BUSCO completion estimates with  
257 values that were significantly lower than the Delmont *et al.* (2021) protocol ( $p_{\text{BH-FDR}} = 3.48 \times 10^{-10}$ ,  
258  $p_{\text{BH-FDR}} = 1.98 \times 10^{-5}$ , respectively; Wilcoxon rank-sum; Figure 4A). The fact that EukMetaSanity  
259 delivers similar MAG completeness scores without the computationally intensive transcriptome map-  
260 ping, while increasing the total number of putative proteins, demonstrates that EukMetaSanity can be  
261 used to provide initial gene predictions for environmental genomes. Excitingly, when a dataset like  
262 the *Tara* Oceans metatranscriptome is available, the *Refine* pipeline is available to automate this step  
263 and provide refined gene predictions through BRAKER2.

264 Interestingly, one putative Delmont *et al.* (2021) MAG (TARA\_MED\_95\_MAG\_00445) consistently  
265 failed to annotate genes with GeneMark-EP. Using genes identified with Augustus and MetaEuk (16  
266 and 1,930 proteins, respectively), annotation with EukMetaSanity resulted in 1,943 non-overlapping  
267 protein predictions. Taxonomy prediction using the MMseqs2 taxonomy subprogram for the MetaEuk-  
268 derived proteins identified 44% as belonging to the Phylum *Ciliophora* and the MAG had a relatively  
269 small proportion (0.33%) of interspersed repeat elements ( $n = 322$ ). A cursory analysis using Tiara  
270 (Karlicki *et al.*, 2021) revealed that the 13.5 Mbp MAG in question consisted of DNA sequences  
271 whose origins were 28.8% eukaryotic, 28.3% bacterial, 10.2% archaeal, 7.3% prokaryotic, and 25.4%  
272 unknown. When protein prediction was performed using Prodigal v2.6.3 (-p meta) (Hyatt *et al.*,  
273 2012), a tool for prokaryotic gene prediction, the number of recovered putative coding sequences  
274 increased from 1,943 to 9,020, suggesting that this particular MAG represented a binning error that  
275 combined genomic content across Domains. This is an interesting test case to illustrate that the cor-  
276 rectly implemented gene annotation pipeline can act as a quality control check on environmentally  
277 derived genomes going forward.

278 Alexander *et al.* (2021) generated 987 eukaryotic MAGs from the *Tara* Oceans large size fraction  
279 metagenomic dataset (Supplemental Data 7). The initial annotation protocol (not published) applied  
280 an *ab initio* pipeline that ran GeneMark-ES and MAKER (Holt and Yandell, 2011) on the input  
281 MAG with no masking of repetitive DNA. Using this annotation as a baseline, both GeneMark-EP  
282 and the Tier 1 approach were not significantly different from the estimated BUSCO completeness  
283 scores compared to the original Alexander *et al.* (2021) protocol ( $p_{\text{BH-FDR}} = 0.3565$ ; Wilcoxon  
284 rank-sum; Figure 4B). Both MetaEuk and Augustus had significantly lower BUSCO completeness  
285 ( $p_{\text{BH-FDR}} = 5.59 \times 10^{-6}$ ,  $p_{\text{BH-FDR}} = 3.19 \times 10^{-10}$ , respectively; Figure 4B). The Tier 1 approach in-  
286 creased the number of identified BUSCO proteins in 402 MAGs (40.7%) with 60 MAGs (6.1%)  
287 seeing an increase of  $\geq 10$  BUSCO proteins, including four MAGs (0.4%) seeing an increase of  $\geq 100$

288 BUSCO proteins. This approach maintained the number of identified BUSCO proteins in 217 MAGs  
289 (22.0%; Figure 4B). Conversely, 368 MAGs (37.3%) decreased in the number of identified BUSCO  
290 proteins, but only 18 MAGs (1.8%) lost  $\geq 10$  BUSCO proteins (Figure 4B). Using the Tier 1 approach,  
291 we increased the total number of proteins identified by 30%. Processing the Alexander *et al.* (2021)  
292 MAGs dataset illustrates how EukMetaSanity increases the quality of gene prediction and the total  
293 number of proteins from such a dataset, profoundly expanding the amount of data that can be passed  
294 to the functional annotation step and used for resolving metabolic reconstructions. The corresponding  
295 EukMetaSanity-derived gene predictions were used to assess functional potential for the Alexander  
296 *et al.* MAGs and provided insight into the ecological distribution of trophic strategies for the dataset  
297 (Alexander *et al.*, 2021).

298 EukMetaSanity is an advanced workflow package for high-throughput gene prediction of eukaryotic  
299 genomes that streamlines the recovery of gene loci in environmental and cultivated genomes. Im-  
300 plementing the EukMetaSanity *Run* pipeline, we were able to annotate 1,785 genomes with repeats,  
301 introns, and exons using multiple top-of-the-line tools with automated selection for the necessary  
302 training data to recover high-quality gene loci information. The work presented here demonstrates  
303 that using the Tier approaches or GeneMark-EP as implemented within EukMetaSanity fits an im-  
304 portant niche for the near future of eukaryotic genome annotation - both rapid preliminary annotation  
305 of genomes lacking transcript evidence and annotation of environmental genomes reconstructed from  
306 undersampled and uncultivated clades. When processed serially, many of the individual steps im-  
307 plemented in EukMetaSanity can be incredibly time intensive (e.g., >30 hours for repeat prediction  
308 and >24 hours for gene loci prediction for >1Gbp genomes) which can create bottlenecks during data  
309 processing. The automated parallelization provided by EukMetaSanity allows researchers to fully  
310 optimize their computational infrastructure, prevent wasted allocation allotments, and, because each  
311 step of EukMetaSanity is compartmentalized, provide an avenue of rapid parameterization of steps  
312 for variations in datasets. Rapid parameterization is especially important when new tools or databases  
313 are introduced into the workflow - which the API has been specifically designed to accommodate by  
314 making large-scale changes accessible with minimal understanding of the core code. EukMetaSanity  
315 provides a first step towards making the annotation of eukaryote genomes as accessible to the average  
316 researcher as current methodologies allow for their prokaryotic counterparts.

## 317 **Methods**

318 EukMetaSanity was implemented using Python and the yapim API ([https://github.com/cjneely10/](https://github.com/cjneely10/YAPIM)  
319 YAPIM). Briefly, the yapim API distributes a data analysis pipeline across multiple inputs using user-  
320 defined memory and CPU resources. By leveraging simple concurrent computing operations such as  
321 locks and conditions, yapim reduces the total execution time for a resource-intensive analysis such  
322 as EukMetaSanity, allowing for and automating the parallelized large-scale analyses of hundreds or  
323 thousands of organisms.

## 324 **Databases**

325 EukMetaSanity is packaged with three pre-computed MMseqs2 protein databases (Steinegger and  
326 Söding, 2017) which are used throughout each pipeline as a source of protein-level evidence to various

327 programs. The databases are the Orthologous Database of Proteins (OrthoDB; n = 1,271 eukaryotic  
328 genomes) (Kriventseva et al., 2019), the Marine Microbial Eukaryotic Transcriptome Sequencing  
329 Project (MMETSP) (Keeling et al., 2014) protein taxonomy database (n = 719 transcriptomes), and a  
330 combined version of the two (OrthoDB-MMETSP) generated by using the `concatdbs` subcommand  
331 of the `MMseqs2` software suite. These databases contain embedded NCBI taxonomy information  
332 which affords sub-setting at various taxonomic levels. Several downstream tools are constrained  
333 by the use of NCBI taxonomy and require synchronization between databases at multiple phases,  
334 providing one of the main limitations between mixing tools and databases from multiple sources. By  
335 default, EukMetaSanity incorporates the OrthoDB-MMETSP database at various steps in its pipelines  
336 to provide adequate coverage of varying biologically-relevant datasets and environments. Users have  
337 the option of selecting to use any of the three provided databases, or to use their own `MMseqs2`  
338 `seqTaxDB` database type.

339 Tools within EukMetaSanity rely on protein evidence to generate accurate predictions. The OrthoDB-  
340 MMETSP database is used to identify putative taxonomy and to generate a subset of proteins that are  
341 mapped to the input genome for intron boundary prediction. The choice of protein database will ul-  
342 timately affect the kinds of evidence that are available in the pipeline. For example, the MMETSP  
343 database underrepresents animals, so using it to annotate a Metazoan genome without including Or-  
344 thodb can drastically affect the quality of an annotation.

## 345 **Run**

346 The *Run* pipeline predicts gene loci and exon-intron boundaries for submitted genomes by accumu-  
347 lating *ab initio* and protein evidence. For each input genome, the *Run* pipeline will generate a set  
348 of one or more gene-finding format files (*e.g.*, GFF, repeats), as well as FASTA files containing the  
349 gene coding regions of the genomic DNA and the derived protein sequences. The results from each  
350 program are optionally merged to a single set of non-overlapping gene locus predictions.

### 351 **Protein evidence gene prediction.**

352 First pass protein prediction is completed using MetaEuk (Levy Karin et al., 2020) and the OrthoDB-  
353 MMETSP database. This step is completed on the input genome prior to masking, and identified  
354 proteins may include pseudo-genes that include larger repetitive DNA elements. MetaEuk predicts  
355 proteins by first performing a six-frame translation on each contig, identifying putative protein-coding  
356 segments. These segments are then searched through the OrthoDB-MMETSP database, and protein  
357 fragments that match to the same reference protein are collected. Fragments corresponding to pu-  
358 tative exons are ordered and scored, and the highest scoring set of exons is returned as the putative  
359 protein. Here, users may provide e-value cutoffs and minimum sequence identities per the MetaEuk  
360 documentation.

### 361 **Taxonomy.**

362 Subsequent steps in the *Run* pipeline rely on protein-based evidence at varying taxonomic levels. The  
363 `MMseqs2` subprogram `taxonomy` provides an assignment of the MetaEuk-predicted protein sequences  
364 generated using OrthoDB-MMETSP. Users may provide e-value, coverage, and sequence identity  
365 cutoffs per the `MMseqs2` documentation. In reported taxonomic assignments, levels that do not meet



366 user-provided cutoffs are labelled with their parent labels (*i.e.*, if the Order-level is not identified,  
367 pipeline steps will operate on the Class-level, etc.).

368 Next, sequences with identified homologs in the database are parsed into a taxon tree, and the NCBI  
369 taxid of the lowest common ancestor is identified between the query and matching protein sequence  
370 sets. The MMseqs2 taxonomyreport submodule converts the results of the taxonomy search to  
371 a taxon tree that displays the organism's likely assignment at various taxonomic levels (Kingdom,  
372 Phylum, *etc.*). Users may provide a lower-bound on the acceptable percentage of proteins that need  
373 to be identified for an assignment.

#### 374 **Repeats identification.**

375 The input genome is processed in order to hard-mask short and long interspersed nuclear repeats, as  
376 well as other DNA transposons, small RNA, and satellite repeats. Two options for repeat identification  
377 have been included as part of the *Run* pipeline. RepeatMasker (Smit et al., 2013) identifies repetitive  
378 DNA content from the DFam library (Hubley et al., 2016) of repeats using either the Family- or  
379 Superfamily-level NCBI taxid identified in the taxonomy step. RepeatModeler2 (Flynn et al., 2020)  
380 can be used as the only source of repeat prediction or in conjunction with a RepeatMasker species to  
381 generate *ab initio* predictions of repetitive DNA regions. Including both levels of repeat annotation  
382 maximizes the chances to identify and mask repeat content in the genome. RepeatModeler has a  
383 long runtime and operates best on genomes with high assembly N50, and RepeatMasker requires  
384 that NCBI repeat models exist for a given genome. Users who do not perform both steps may miss  
385 repeat content. Because repetitive DNA regions may include pseudo-genes whose intron boundaries  
386 do not reflect intron models of true genes, these regions must be masked prior to subsequent *ab initio*  
387 prediction to generate the most accurate models of intron splice sites in a given organism. Both of  
388 these DNA repeat models are then used to hard-mask any repeat regions identified, excluding low-  
389 complexity repeats. Users may also provide external repeat libraries to use in masking at this step, if  
390 they are available or for more complex organisms.

#### 391 ***Ab initio* gene prediction.**

392 EukMetaSanity contains implementations for two *ab initio* gene prediction programs. In both cases,  
393 repeat-masked genome sequences are used as input. Users may use one or both *ab initio* protocols.  
394 Using both protocols affords the additional opportunity to capture gene content that may be missed  
395 by the other predicting software.

396 Augustus (Stanke et al., 2006): Augustus is packaged with gene identification models for var-  
397 ious animals, alveolates, plants/algae, fungi, bacteria, and archaea. EukMetaSanity automates  
398 the selection of an Augustus species model for each input genome by running the MMseqs2  
399 linsearch module to identify proteins in the masked genome sequence that are found in the  
400 OrthoDB-MMETSP database. The Augustus species that bears the highest number of assign-  
401 ments to proteins identified by linsearch is selected as the model for the first round of *ab initio*  
402 training. Users may provide search criteria to linsearch that specify minimum sequence identity,  
403 coverage, *etc.*

404 Subsequent rounds of training are conducted iteratively by generating training parameters based  
405 on the results of the prior round. This is accomplished using the Augustus subprograms `gff2gbSmallDNA.pl`,

406 `new_species.pl`, and `etraining`. Typically, one additional round of Augustus training is suffi-  
407 cient, but users may elect to perform more training rounds as desired. High numbers of training  
408 rounds may result in a gradual reduction in captured gene content, so users are advised against  
409 over-training.

410 GeneMark-EP/ES (Bruna et al., 2020; Lomsadze et al., 2005): Using the MMseqs2 module  
411 `filtertaxseqdb`, proteins that share the same Order-level assignment as the input genome are  
412 subset from the OrthoDB-MMETSP database. These proteins are provided as input to the Gene-  
413 Mark subprogram `Prothint`, which generates intron predictions by performing spliced protein  
414 alignments of the sequences selected from OrthoDB-MMETSP to the masked genome using  
415 the program `Spaln` (Gotoh, 2008). If `Prothint` fails, or  $< 100$  introns are predicted, then pro-  
416 teins are predicted using GeneMark-ES. Otherwise, output from `Prothint` is provided with the  
417 masked genome as input to GeneMark-EP. Users may provide parameters to either `Prothint` or  
418 GeneMark-EP to filter the allowable contig and gene sizes in the prediction protocol. GeneMark-  
419 EP or -ES is automatically run in fungal mode for relevant genomes.

## 420 **Merging final results.**

421 While the output of each preceding program can be used directly, we provide a final merging pro-  
422 tocol to reduce the gene annotations to a single set of gene predictions per gene locus in poly-  
423 logarithmic time (<https://github.com/cjneely10/LocusSolver>). Each annotation file is input  
424 into the merging script in GFF3 format. Annotation locations (loci) are merged into larger “superloci”  
425 which can consist of one or more gene tracks at that locus. For each strand within each superlocus, a  
426 predicted gene is selected, with priority selection assigned to GeneMark-EP/ES, then Augustus, and  
427 finally to MetaEuk (Tier 1; Figure S1). Users may add an additional filter to retain only genes whose  
428 locus is supported by more than one line of evidence (Tier 2 or Tier 3; Figure S1).

## 429 **Refine**

430 The *Refine* pipeline is a transcriptome-based gene prediction workflow that uses BRAKER2 (Bruna  
431 et al., 2021) for predictions. The repeat-masked genome and Order-level proteins subset from the  
432 OrthoDB-MMETSP database generated in the *Run* pipeline are used as inputs. Users may also choose  
433 to incorporate the gene prediction results from a previously completed GeneMark-EP/ES implemen-  
434 tation in the *Run* pipeline, or may start a new *ab initio* gene prediction process. Users will provide  
435 either trimmed RNA-seq reads or assembled transcriptomes as input to the pipeline. Trimmed RNA-  
436 seq data are mapped to the masked genome using Hisat2 (Kim et al., 2019), the SAM output of which  
437 is subsequently converted to BAM format and sorted using Sambamba (Tarasov et al., 2015). As-  
438 sembled transcriptomes are mapped to the input genome using GMAP (Wu and Watanabe, 2005), the  
439 results of which are then similarly converted and sorted to BAM format. The combined set of out-  
440 put BAM files are provided as input to BRAKER2, which outputs multiple result formats including  
441 Augustus- and GeneMark-based predictions. The additional level of evidence provided by gene ex-  
442 pression data captures feature content such as alternative transcription start sites and the locations of  
443 5’ and 3’ untranslated regions of genes. Additionally, gene expression data can modify and improve  
444 results from *Run*-derived predictions.

## 445 **Report**

446 The *Report* pipeline provides functional annotation of the predicted proteins. This pipeline anno-  
447 tates gene loci predicted in either the *Run* and/or *Refine* stages using MMseqs2 (Steinegger and Söd-  
448 ing, 2017), eggNOG-emapper (Huerta-Cepas et al., 2019, 2018), and/or KofamScan (Aramaki et al.,  
449 2019). MMseqs2 runs the subprogram `search` or `linsearch` against a number of pre-computed  
450 databases provided from the MMseqs2 authors (`mmseqs databases` command), including Pfam (El-  
451 Gebali et al., 2018), UniRef (Suzek et al., 2007), the NCBI non-redundant protein database, db-  
452 CAN2 (Zhang et al., 2018), and others, all of which can be used to assign functional annotation  
453 to genes. The download of these databases occurs outside of EukMetaSanity, but any number of  
454 pre-computed or user generated databases can be designated for search with this step within the con-  
455 figuration file. eggNOG-emapper and KofamScan are implemented within this pipeline to provide  
456 eggNOG and KEGG functional annotations to proteins, respectively. These programs are distributed  
457 through their specific organizations and must be installed externally with instructions provided on  
458 the EukMetaSanity installation page ([https://github.com/cjneely10/EukMetaSanity/blob/  
459 main/INSTALLATION.md](https://github.com/cjneely10/EukMetaSanity/blob/main/INSTALLATION.md)). Tab-delimited summary files for each gene call are generated.

## 460 **Benchmark Datasets**

461 We tested how well EukMetaSanity accurately predicted proteins using three different datasets. Pa-  
462 rameters used with EukMetaSanity can be found in Table S2. We collected a set of 112 gold standard  
463 genomes from NCBI (National Library of Medicine , US) from various taxonomic levels across the  
464 tree of life (accessed 7 January 2021; Supplemental Data 1). We selected 34 fungal genomes that  
465 belonged to 15 fungal Orders (Supplemental Data 4). For each Order, we generated an MMseqs2  
466 database from the combined OrthoDB-MMETSP database that removed all proteins from the target  
467 Order using the MMseqs subprogram `filtertaxseqdb`. Each fungal genome was then annotated  
468 using the EukMetaSanity *Run* pipeline with a respective database depleted in proteins from their  
469 identified Order. EukMetaSanity was tested against a large eukaryotic MAG dataset of 1,669 MAGs,  
470 generated from the *Tara* Oceans metagenomic datasets by Delmont *et al.* (2021) (n = 682 MAGs; Sup-  
471 plemental Data 6) and Alexander *et al.* (2021) (n = 987 MAGs; Supplemental Data 7). In Delmont *et al.*  
472 *et al.* (2021), the MAGs were annotated using a tripartite approach that integrated protein alignments,  
473 metatranscriptomic mapping, and *ab initio* gene predictions. In Alexander *et al.* (2021), the MAGs  
474 were annotated using GeneMark-ES and the MAKER pipeline with no repeat masking. Both sets of  
475 MAGs were annotated using the EukMetaSanity *Run* pipeline with the complete OrthoDB-MMETSP  
476 databases.

## 477 **Benchmarking**

478 We assessed gene prediction performance at the whole genome level by comparing BUSCO (Seppey  
479 et al., 2019) completeness results with the eukaryota\_odb10 dataset, and the sensitivity and pre-  
480 cision of individual gene loci for EukMetaSanity results compared to the annotations provided by  
481 NCBI. Each of the four gene loci prediction protocols (MetaEuk, GeneMark-EP, Augustus, and the  
482 Tier 1 approach) were compared against the NCBI reference annotations.

483 For all gene predictions from NCBI references, MAGs, and EukMetaSanity, protein-level annotations  
484 in GFF/GFF3 format were converted to protein sequences using GFFread v0.12.1 and subsequently

485 processed by BUSCO v4.1.2 (parameters: -m prot -l eukaryota) to provide a completeness es-  
486 timate for each genome. We compared the distribution of BUSCO completeness scores identified  
487 in the reference annotations to the EukMetaSanity annotations from each gene prediction protocol  
488 with significance determined using the Wilcoxon rank-sum statistic (Mann and Whitney, 1947) with  
489 Benjamini-Hochberg multiple test correction (Benjamini and Hochberg, 1995).

490 Using the program GffCompare v0.12.5 (Pertea and Pertea, 2020), we generated metrics that com-  
491 pared the reference annotations to annotations derived from the programs contained within Euk-  
492 MetaSanity. These metrics summarized the sensitivity ( $S = TP/(TP + FN)$ ) and precision ( $P =$   
493  $TP/(TP + FP)$ ) between the reference and query annotations at the base, exon, intron, and intron-  
494 chain (locus) levels. At the base-, exon-, and intron-levels, a query feature is only marked as a true  
495 positive if the start and end coordinates exactly match the reference. For intron chains, all introns in  
496 the query transcript must exactly match the reference transcript. At the locus level, a putative intron  
497 chain in the query locus must exactly match an intron chain in the set of intron chains present at the  
498 reference locus. Intron chain-level accuracy allows a maximum distance of 100bp between the ends  
499 of the terminal exons in the query locus and the ends of the reference locus.

500 We developed LocusCompare ([https://github.com/cjneely10/EukMetaSanity/blob/main/](https://github.com/cjneely10/EukMetaSanity/blob/main/tests/LocusCompare.py)  
501 [tests/LocusCompare.py](https://github.com/cjneely10/EukMetaSanity/blob/main/tests/LocusCompare.py)) as an additional metric that determines gene-specific sensitivity and pre-  
502 cision based on an overlapping locus in the genome and compares the predicted gene to the reference  
503 gene (Figure S4). We determined the fraction of the reference gene covered by the prediction by  
504 dividing the length of the overlapping region by the total length of the reference gene. We then set  
505 threshold cutoffs values between 0.1 and 1.0 and considered features that meet the threshold as TPs,  
506 and those that do not meet the threshold (or that bear redundancies) as FPs. Any missed reference  
507 gene locus is marked as a FN. F1 scores were calculated for each annotation set for each threshold  
508 ( $F1 = 2 \times (S \times P)/(S + P)$ ).

## 509 References

- 510 H. Alexander, S. K. Hu, A. I. Krinos, M. Pachiadaki, B. J. Tully, C. J. Neely, and T. Rieter. Eukaryotic  
511 genomes from a global metagenomic dataset illuminate trophic modes and biogeography of ocean  
512 plankton. *bioRxiv*, 2021. doi: 10.1101/.
- 513 T. Aramaki, R. Blanc-Mathieu, H. Endo, K. Ohkubo, M. Kanehisa, S. Goto, and H. Ogata. Ko-  
514 famKOALA: KEGG Ortholog assignment based on profile HMM and adaptive score thresh-  
515 old. 2019. doi: 10.1093/bioinformatics/btz859. URL [https://academic.oup.com/](https://academic.oup.com/bioinformatics/article/36/7/2251/5631907)  
516 [bioinformatics/article/36/7/2251/5631907](https://academic.oup.com/bioinformatics/article/36/7/2251/5631907).
- 517 S. Banerjee, P. Bhandary, M. Woodhouse, T. Z. Sen, R. P. Wise, and C. M. Andorf. FINDER: an au-  
518 tomated software package to annotate eukaryotic genes from RNA-Seq data and associated protein  
519 sequences. *BMC bioinformatics*, pages 1–26, Apr. 2021.
- 520 Y. Benjamini and Y. Hochberg. Controlling the False Discovery Rate: A Practical and Powerful  
521 Approach to Multiple Testing. *Journal of the Royal Statistical Society. Series B Methodological*,  
522 57(1):289–300, Oct. 1995.
- 523 T. Bruna, A. Lomsadze, and M. Borodovsky. GeneMark-EP+: eukaryotic gene prediction with self-

- 524 training in the space of genes and proteins. *NAR Genomics and Bioinformatics*, 2(2), jun 2020.  
525 ISSN 2631-9268. doi: 10.1093/nargab/lqaa026. URL [https://academic.oup.com/nargab/  
526 article/doi/10.1093/nargab/lqaa026/5836691](https://academic.oup.com/nargab/article/doi/10.1093/nargab/lqaa026/5836691).
- 527 T. Bruna, K. J. Hoff, A. Lomsadze, M. Stanke, and M. Borodovsky. BRAKER2: automatic  
528 eukaryotic genome annotation with GeneMark-EP+ and AUGUSTUS supported by a protein  
529 database. *NAR Genomics and Bioinformatics*, 3(1), 2021. doi: 10.1093/nargab/lqaa108. URL  
530 <https://academic.oup.com/nargab/article/3/1/lqaa108/6066535>.
- 531 B. L. Cantarel, I. Korf, S. M. C. Robb, G. Parra, E. Ross, B. Moore, C. Holt, A. Sánchez Alvarado, and  
532 M. Yandell. MAKER: an easy-to-use annotation pipeline designed for emerging model organism  
533 genomes. *Genome Research*, 18(1):188–196, Jan. 2008.
- 534 Q. Carradec, E. Pelletier, C. Da Silva, A. Alberti, Y. Seeleuthner, R. Blanc-Mathieu, G. Lima-  
535 Mendez, F. Rocha, L. Tirichine, K. Labadie, A. Kirilovsky, A. Bertrand, S. Engelen, M.-A. Madoui,  
536 R. Méheust, J. Poulain, S. Romac, D. J. Richter, G. Yoshikawa, C. Dimier, S. Kandels-Lewis,  
537 M. Picheral, S. Searson, S. G. Acinas, E. Boss, M. Follows, G. Gorsky, N. Grimsley, L. Karp-Boss,  
538 U. Krzic, S. Pesant, E. G. Reynaud, C. Sardet, M. Sieracki, S. Speich, L. Stemmann, D. Velay-  
539 oudon, J. Weissenbach, O. Jaillon, J.-M. Aury, E. Karsenti, M. B. Sullivan, S. Sunagawa, P. Bork,  
540 F. Not, P. Hingamp, J. Raes, L. Guidi, H. Ogata, C. de Vargas, D. Iudicone, C. Bowler, and  
541 P. Wincker. A global ocean atlas of eukaryotic genes. *Nature Communications*, 9(1):373, 2018.  
542 ISSN 2041-1723. doi: 10.1038/s41467-017-02342-1.
- 543 B. A. Curtis, G. Tanifuji, F. Burki, A. Gruber, M. Irimia, S. Maruyama, M. C. Arias, S. G. Ball, G. H.  
544 Gile, Y. Hirakawa, J. F. Hopkins, A. Kuo, S. A. Rensing, J. Schmutz, A. Symeonidi, M. Elias,  
545 R. J. M. Eveleigh, E. K. Herman, M. J. Klute, T. Nakayama, M. Obornik, A. Reyes-Prieto, E. V.  
546 Armbrust, S. J. Aves, R. G. Beiko, P. Coutinho, J. B. Dacks, D. G. Durnford, N. M. Fast, B. R.  
547 Green, C. J. Grisdale, F. Hempel, B. Henrissat, M. P. Höppner, K.-I. Ishida, E. Kim, L. Kořený,  
548 P. G. Kroth, Y. Liu, S.-B. Malik, U. G. Maier, D. McRose, T. Mock, J. A. D. Neilson, N. T. Onodera,  
549 A. M. Poole, E. J. Pritham, T. A. Richards, G. Rocap, S. W. Roy, C. Sarai, S. Schaack, S. Shirato,  
550 C. H. Slamovits, D. F. Spencer, S. Suzuki, A. Z. Worden, S. Zauner, K. Barry, C. Bell, A. K.  
551 Bharti, J. A. Crow, J. Grimwood, R. Kramer, E. Lindquist, S. Lucas, A. Salamov, G. I. McFadden,  
552 C. E. Lane, P. J. Keeling, M. W. Gray, I. V. Grigoriev, and J. M. Archibald. Algal genomes reveal  
553 evolutionary mosaicism and the fate of nucleomorphs. *Nature*, 492(7427):59–65, Nov. 2012.
- 554 A. Danchin, C. Ouzounis, T. Tokuyasu, and J.-D. Zucker. No wisdom in the crowd: genome anno-  
555 tation in the era of big data - current status and future prospects. *Microbial Biotechnology*, 11(4):  
556 588–605, July 2018.
- 557 T. O. Delmont, M. Gaia, D. D. Hinsinger, P. Fremont, C. Vanni, A. F. Guerra, A. M. Eren,  
558 A. Kourlaiev, L. d’Agata, Q. Clayssen, E. Villar, K. Labadie, C. Cruaud, J. Poulain, C. Da Silva,  
559 M. Wessner, B. Noel, J.-M. Aury, T. O. Coordinators, C. de Vargas, C. Bowler, E. Karsenti,  
560 E. Pelletier, P. Wincker, and O. Jaillon. Functional repertoire convergence of distantly related  
561 eukaryotic plankton lineages revealed by genome-resolved metagenomics. *bioRxiv*, 2021. doi:  
562 10.1101/2020.10.15.341214. URL [https://www.biorxiv.org/content/early/2021/01/23/  
563 2020.10.15.341214](https://www.biorxiv.org/content/early/2021/01/23/2020.10.15.341214).
- 564 A. Duncan, K. Barry, C. Daum, E. Eløe-Fadrosch, S. Roux, S. G. Tringe, K. Schmidt, K. U.



- 565 Valentin, N. Varghese, I. V. Grigoriev, R. Leggett, V. Moulton, and T. Mock. Metagenome-  
566 assembled genomes of phytoplankton communities across the arctic circle. *bioRxiv*, 2020. doi:  
567 10.1101/2020.06.16.154583. URL [https://www.biorxiv.org/content/early/2020/06/17/](https://www.biorxiv.org/content/early/2020/06/17/2020.06.16.154583)  
568 2020.06.16.154583.
- 569 S. El-Gebali, J. Mistry, A. Bateman, S. R. Eddy, A. Luciani, S. C. Potter, M. Qureshi, L. J. Richardson,  
570 G. A. Salazar, A. Smart, E. L. L. Sonnhammer, L. Hirsh, L. Paladin, D. Piovesan, S. C. E. Tosatto,  
571 and R. D. Finn. The Pfam protein families database in 2019. *Nucleic Acids Research*, 47(D1):  
572 D427–D432, Oct. 2018.
- 573 E. Faure, S.-D. Ayata, and L. Bittner. Towards omics-based predictions of planktonic functional  
574 composition from environmental data. *Nature Communications*, pages 1–15, July 2021.
- 575 J. M. Flynn, R. Hubley, C. Goubert, J. Rosen, A. G. Clark, C. Feschotte, and A. F. Smit. Repeat-  
576 Modeler2 for automated genomic discovery of transposable element families. *Proceedings of the*  
577 *National Academy of Sciences of the United States of America*, 117(17):9451–9457, apr 2020.  
578 ISSN 10916490. doi: 10.1073/pnas.1921046117. URL [https://www.pnas.org/content/117/](https://www.pnas.org/content/117/17/9451)  
579 17/9451<https://www.pnas.org/content/117/17/9451.abstract>.
- 580 O. Gotoh. A space-efficient and accurate method for mapping and aligning cDNA sequences onto  
581 genomic sequence. *Nucleic Acids Research*, 36(8):2630–2638, 03 2008. ISSN 0305-1048. doi:  
582 10.1093/nar/gkn105. URL <https://doi.org/10.1093/nar/gkn105>.
- 583 K. J. Hoff and M. Stanke. WebAUGUSTUS—a web service for training AUGUSTUS and predicting  
584 genes in eukaryotes. *Nucleic Acids Research*, 41(W1):W123–W128, 05 2013. ISSN 0305-1048.  
585 doi: 10.1093/nar/gkt418. URL <https://doi.org/10.1093/nar/gkt418>.
- 586 K. J. Hoff, S. Lange, A. Lomsadze, M. Borodovsky, and M. Stanke. BRAKER1: Unsupervised  
587 RNA-Seq-Based Genome Annotation with GeneMark-ET and AUGUSTUS. *Bioinformatics*, 32  
588 (5):767–769, 11 2015. ISSN 1367-4803. doi: 10.1093/bioinformatics/btv661. URL [https://](https://doi.org/10.1093/bioinformatics/btv661)  
589 [doi.org/10.1093/bioinformatics/btv661](https://doi.org/10.1093/bioinformatics/btv661).
- 590 C. Holt and M. Yandell. MAKER2: an annotation pipeline and genome-database management tool  
591 for second-generation genome projects. *BMC bioinformatics*, 12(1):491–14, Dec. 2011.
- 592 R. Hubley, R. D. Finn, J. Clements, S. R. Eddy, T. A. Jones, W. Bao, A. F. Smit, and T. J. Wheeler. The  
593 Dfam database of repetitive DNA families. *Nucleic Acids Research*, 44(D1):D81–D89, jan 2016.  
594 ISSN 13624962. doi: 10.1093/nar/gkv1272. URL [www.phrap.org/phredphrapconsed.html](http://www.phrap.org/phredphrapconsed.html).
- 595 J. Huerta-Cepas, D. Szklarczyk, D. Heller, A. Hernández-Plaza, S. K. Forslund, H. Cook, D. R.  
596 Mende, I. Letunic, T. Rattei, L. J. Jensen, C. Von Mering, and P. Bork. eggNOG 5.0: a hierarchical,  
597 functionally and phylogenetically annotated orthology resource based on 5090 organisms and 2502  
598 viruses. *Nucleic Acids Research*, 47:309–314, 2018. doi: 10.1093/nar/gky1085. URL [https://](https://academic.oup.com/nar/article/47/D1/D309/5173662)  
599 [academic.oup.com/nar/article/47/D1/D309/5173662](https://academic.oup.com/nar/article/47/D1/D309/5173662).
- 600 J. Huerta-Cepas, K. Forslund, L. P. Coelho, D. Szklarczyk, L. J. Jensen, C. Von Mering, and P. Bork.  
601 Fast Genome-Wide Functional Annotation through Orthology Assignment by eggNOG-Mapper.  
602 2019. doi: 10.1093/molbev/msx148. URL [http://creativecommons](http://creativecommons.org/licenses/by/4.0/).

- 603 D. Hyatt, P. F. LoCascio, L. J. Hauser, and E. C. Uberbacher. Gene and translation initiation site  
604 prediction in metagenomic sequences. *Bioinformatics*, 28(17):2223–2230, Sept. 2012.
- 605 M. Karlicki, S. Antonowicz, and A. Karnkowska. Tiara: Deep learning-based classification system  
606 for eukaryotic sequences. *bioRxiv*, pages 15–17, Feb. 2021.
- 607 P. J. Keeling, F. Burki, H. M. Wilcox, B. Allam, E. E. Allen, L. A. Amaral-Zettler, E. V. Armbrust,  
608 J. M. Archibald, A. K. Bharti, C. J. Bell, B. Beszteri, K. D. Bidle, C. T. Cameron, L. Campbell,  
609 D. A. Caron, R. A. Cattolico, J. L. Collier, K. Coyne, S. K. Davy, P. Deschamps, S. T. Dyrman,  
610 B. Edvardsen, R. D. Gates, C. J. Gobler, S. J. Greenwood, S. M. Guida, J. L. Jacobi, K. S. Jakobsen,  
611 E. R. James, B. Jenkins, U. John, M. D. Johnson, A. R. Juhl, A. Kamp, L. A. Katz, R. Kiene,  
612 A. Kudryavtsev, B. S. Leander, S. Lin, C. Lovejoy, D. Lynn, A. Marchetti, G. McManus, A. M.  
613 Nedelcu, S. Menden-Deuer, C. Miceli, T. Mock, M. Montresor, M. A. Moran, S. Murray, G. Na-  
614 dathur, S. Nagai, P. B. Ngam, B. Palenik, J. Pawlowski, G. Petroni, G. Piganeau, M. C. Posewitz,  
615 K. Rengefors, G. Romano, M. E. Rumpho, T. Ryneerson, K. B. Schilling, D. C. Schroeder, A. G. B.  
616 Simpson, C. H. Slamovits, D. R. Smith, G. J. Smith, S. R. Smith, H. M. Sosik, P. Stief, E. Theriot,  
617 S. N. Twary, P. E. Umale, D. Vaultot, B. Wawrik, G. L. Wheeler, W. H. Wilson, Y. Xu, A. Zin-  
618 gone, and A. Z. Worden. The Marine Microbial Eukaryote Transcriptome Sequencing Project  
619 (MMETSP): Illuminating the Functional Diversity of Eukaryotic Life in the Oceans through Tran-  
620 scriptome Sequencing. *PLOS Biology*, 12(6):1–6, 2014. doi: 10.1371/journal.pbio.1001889. URL  
621 <https://doi.org/10.1371/journal.pbio.1001889>.
- 622 D. Kim, J. M. Paggi, C. Park, C. Bennett, and S. L. Salzberg. Graph-based genome alignment and  
623 genotyping with HISAT2 and HISAT-genotype. *Nature Biotechnology*, 37(8):907–915, aug 2019.  
624 ISSN 15461696. doi: 10.1038/s41587-019-0201-4.
- 625 E. V. Kriventseva, D. Kuznetsov, F. Tegenfeldt, M. Manni, R. Dias, F. A. Simão, and E. M. Zdobnov.  
626 OrthoDB v10: Sampling the diversity of animal, plant, fungal, protist, bacterial and viral genomes  
627 for evolutionary and functional annotations of orthologs. *Nucleic Acids Research*, 47(D1):D807–  
628 D811, jan 2019. ISSN 13624962. doi: 10.1093/nar/gky1053. URL <https://www.orthodb.org>.
- 629 L. Leclère, C. Horin, S. Chevalier, P. Lapébie, P. Dru, S. Peron, M. Jager, T. Condamine, K. Pot-  
630 tin, S. Romano, J. Steger, C. Sinigaglia, C. Barreau, G. Q. Artigas, A. Ruggiero, C. Fourrage,  
631 J. E. M. Kraus, J. Poulain, J.-M. Aury, P. Wincker, E. Quéinnec, U. Technau, M. Manuel, T. Mo-  
632 mose, E. Houlston, and R. R. Copley. The genome of the jellyfish *Clytia hemisphaerica* and  
633 the evolution of the cnidarian life-cycle. *Nature Ecology & Evolution*, 3(5):801–810, 2019. doi:  
634 10.1038/s41559-019-0833-2.
- 635 E. Levy Karin, M. Mirdita, and J. Söding. MetaEuk-sensitive, high-throughput gene discov-  
636 ery, and annotation for large-scale eukaryotic metagenomics. *Microbiome*, 8(1):48, apr 2020.  
637 ISSN 20492618. doi: 10.1186/s40168-020-00808-x. URL [https://microbiomejournal.  
638 biomedcentral.com/articles/10.1186/s40168-020-00808-x](https://microbiomejournal.biomedcentral.com/articles/10.1186/s40168-020-00808-x).
- 639 F.-W. Li, P. Brouwer, L. Carretero-Paulet, S. Cheng, J. d. Vries, P.-M. Delaux, A. Eily, N. Koppers,  
640 L.-Y. Kuo, Z. Li, M. Simenc, I. Small, E. Wafula, S. Angarita, M. S. Barker, A. Bräutigam, C. de-  
641 Pamphilis, S. Gould, P. S. Hosmani, Y.-M. Huang, B. Huettel, Y. Kato, X. Liu, S. Maere, R. Mc-  
642 Dowell, L. A. Mueller, K. G. J. Nierop, S. A. Rensing, T. Robison, C. J. Rothfels, E. M. Sigel,  
643 Y. Song, P. R. Timilsena, Y. V. d. Peer, H. Wang, P. K. I. Wilhelmsson, P. G. Wolf, X. Xu, J. P. Der,

- 644 H. Schluepmann, G. K.-S. Wong, and K. M. Pryer. Fern genomes elucidate land plant evolution and  
645 cyanobacterial symbioses. *Nature Plants*, 4(7):460–472, 2018. doi: 10.1038/s41477-018-0188-8.
- 646 A. Lomsadze, V. Ter-Hovhannisyanyan, Y. O. Chernoff, and M. Borodovsky. Gene identification in  
647 novel eukaryotic genomes by self-training algorithm. *Nucleic Acids Research*, 33(20):6494–6506,  
648 01 2005. ISSN 0305-1048. doi: 10.1093/nar/gki937. URL [https://doi.org/10.1093/nar/  
649 gki937](https://doi.org/10.1093/nar/gki937).
- 650 A. Lomsadze, P. D. Burns, and M. Borodovsky. Integration of mapped RNA-Seq reads into automatic  
651 training of eukaryotic gene finding algorithm. *Nucleic Acids Research*, 42(15):e119–e119, 07 2014.  
652 ISSN 0305-1048. doi: 10.1093/nar/gku557. URL <https://doi.org/10.1093/nar/gku557>.
- 653 H. B. Mann and D. R. Whitney. On a test of whether one of two random variables is stochastically  
654 larger than the other. *Annals of Mathematical Statistics*, 18(1):50–60, 1947.
- 655 T. Mock, R. P. Otilar, J. Strauss, M. McMullan, P. Paajanen, J. Schmutz, A. Salamov, R. Sanges,  
656 A. Toseland, B. J. Ward, A. E. Allen, C. L. Dupont, S. Frickenhaus, F. Maumus, A. Veluchamy,  
657 T. Wu, K. W. Barry, A. Falciatore, M. I. Ferrante, A. E. Fortunato, G. Glöckner, A. Gruber, R. Hip-  
658 kin, M. G. Janech, P. G. Kroth, F. Leese, E. A. Lindquist, B. R. Lyon, J. Martin, C. Mayer,  
659 M. Parker, H. Quesneville, J. A. Raymond, C. Uhlig, R. E. Valas, K. U. Valentin, A. Z. Wor-  
660 den, E. V. Armbrust, M. D. Clark, C. Bowler, B. R. Green, V. Moulton, C. v. Oosterhout, and I. V.  
661 Grigoriev. Evolutionary genomics of the cold-adapted diatom *Fragilariopsis cylindrus*. *Nature*, 541  
662 (7638):536–540, 2017. ISSN 0028-0836. doi: 10.1038/nature20803.
- 663 N. C. f. B. I. National Library of Medicine (US). National center for biotechnology information  
664 (ncbi). <https://www.ncbi.nlm.nih.gov>, 1988.
- 665 G. Niang, M. Hoebeke, A. Meng, X. Liu, M. Scheremetjew, R. Finn, E. Pelletier, and E. Corre.  
666 Metdb, an extended reference resource for marine eukaryote transcriptomes. [http://metdb.  
sb-roscoff.fr/metdb/](http://metdb.<br/>667 sb-roscoff.fr/metdb/), 2020.
- 668 M. Pertea and G. Pertea. GFF Utilities: GffRead and GffCompare. *F1000Research*, 9:304, sep 2020.  
669 ISSN 1759796X. doi: 10.12688/f1000research.23297.1. URL [https://doi.org/10.12688/  
670 f1000research.23297.1](https://doi.org/10.12688/f1000research.23297.1).
- 671 S. Pesant, F. Not, M. Picheral, S. Kandels-Lewis, N. L. Bescot, G. Gorsky, D. Iudicone, E. Karsenti,  
672 S. Speich, R. Troublé, C. Dimier, and S. Searson. Open science resources for the discovery and  
673 analysis of tara oceans data. *Sci Data*, 2(1), may 2015. doi: 10.1038/sdata.2015.23. URL <https://doi.org/10.1038/sdata.2015.23>.  
674 [//doi.org/10.1038/sdata.2015.23](https://doi.org/10.1038/sdata.2015.23).
- 675 D. J. Richter, C. Berney, J. F. H. Strasser, F. Burki, and C. de Vargas. Eukprot: a database of genome-  
676 scale predicted proteins across the diversity of eukaryotic life. *bioRxiv*, 2020. doi: 10.1101/2020.  
677 06.30.180687. URL [https://www.biorxiv.org/content/early/2020/07/01/2020.06.30.  
678 180687](https://www.biorxiv.org/content/early/2020/07/01/2020.06.30.180687).
- 679 S. L. Salzberg. Next-generation genome annotation: we still struggle to get it right. pages 1–3, May  
680 2019.
- 681 M. Seppey, M. Manni, and E. M. Zdobnov. BUSCO: Assessing genome assembly and annotation  
682 completeness. In *Methods in Molecular Biology*, volume 1962, pages 227–245. Humana Press

- 683 Inc., 2019. doi: 10.1007/978-1-4939-9173-0\_14. URL [https://pubmed.ncbi.nlm.nih.gov/](https://pubmed.ncbi.nlm.nih.gov/31020564/)  
684 31020564/.
- 685 E. Shoguchi, G. Beedessee, I. Tada, K. Hisata, T. Kawashima, T. Takeuchi, N. Arakaki, M. Fujie,  
686 R. Koyanagi, M. C. Roy, M. Kawachi, M. Hidaka, N. Satoh, and C. Shinzato. Two divergent Sym-  
687 biodinium genomes reveal conservation of a gene cluster for sunscreen biosynthesis and recently  
688 lost genes. *BMC Genomics*, 19(1):458, 2018. doi: 10.1186/s12864-018-4857-9.
- 689 A. Smit, R. Hubley, and P. Green. Repeatmasker. <https://www.repeatmasker.org/>, 2013.
- 690 M. Stanke, O. Schoffmann, B. Morgenstern, and S. Waack. Gene prediction in eukaryotes with a gen-  
691 eralized hidden Markov model that uses hints from external sources. *BMC Bioinformatics*, 7(1):62,  
692 feb 2006. ISSN 14712105. doi: 10.1186/1471-2105-7-62. URL [http://bmcbioinformatics.](http://bmcbioinformatics.biomedcentral.com/articles/10.1186/1471-2105-7-62)  
693 [biomedcentral.com/articles/10.1186/1471-2105-7-62](http://bmcbioinformatics.biomedcentral.com/articles/10.1186/1471-2105-7-62).
- 694 M. Steinegger and J. Söding. MMseqs2 enables sensitive protein sequence searching for the analysis  
695 of massive data sets. 35(11):1026–1028, nov 2017. ISSN 15461696. doi: 10.1038/nbt.3988. URL  
696 <https://www.nature.com/articles/nbt.3988>.
- 697 B. E. Suzek, H. Huang, P. McGarvey, R. Mazumder, and C. H. Wu. UniRef: comprehensive  
698 and non-redundant UniProt reference clusters. *Bioinformatics*, 23(10):1282–1288, 03 2007.  
699 ISSN 1367-4803. doi: 10.1093/bioinformatics/btm098. URL [https://doi.org/10.1093/](https://doi.org/10.1093/bioinformatics/btm098)  
700 [bioinformatics/btm098](https://doi.org/10.1093/bioinformatics/btm098).
- 701 A. Tarasov, A. J. Vilella, E. Cuppen, I. J. Nijman, and P. Prins. Sambamba: fast processing of NGS  
702 alignment formats. 2015. doi: 10.5281/zenodo.13200. URL [http://picard.sourceforge.](http://picard.sourceforge.net/)  
703 [net/](http://picard.sourceforge.net/).
- 704 P. T. West, A. J. Probst, I. V. Grigoriev, B. C. Thomas, and J. F. Banfield. Genome-reconstruction for  
705 eukaryotes from complex natural microbial communities. *Genome Research*, 28(4):569–580, Apr.  
706 2018.
- 707 T. D. Wu and C. K. Watanabe. GMAP: a genomic mapping and alignment program for mRNA and  
708 EST sequences. *Bioinformatics*, 21(9):1859–1875, 02 2005. ISSN 1367-4803. doi: 10.1093/  
709 [bioinformatics/bti310](https://doi.org/10.1093/bioinformatics/bti310). URL <https://doi.org/10.1093/bioinformatics/bti310>.
- 710 G. Xu, C. Bian, Z. Nie, J. Li, Y. Wang, D. Xu, X. You, H. Liu, J. Gao, H. Li, K. Liu, J. Yang,  
711 Q. Li, N. Shao, Y. Zhuang, D. Fang, T. Jiang, Y. Lv, Y. Huang, R. Gu, J. Xu, W. Ge, Q. Shi, and  
712 P. Xu. Genome and population sequencing of a chromosome-level genome assembly of the Chinese  
713 tapertail anchovy (*Coilia nasus*) provides novel insights into migratory adaptation. *GigaScience*, 9  
714 (1), 2020. doi: 10.1093/gigascience/giz157.
- 715 M. Yandell and D. Ence. A beginner’s guide to eukaryotic genome annotation. *Nature Reviews*  
716 *Genetics*, 13(5):329–342, 2012. ISSN 1471-0056. doi: 10.1038/nrg3174.
- 717 A. B. Yoo, M. A. Jette, and M. Grondona. SLURM: Simple Linux Utility for Resource Management.  
718 pages 44–60, 2003.
- 719 H. Zhang, T. Yohe, L. Huang, S. Entwistle, P. Wu, Z. Yang, P. K. Busk, Y. Xu, and Y. Yin. dbCAN2:  
720 a meta server for automated carbohydrate-active enzyme annotation. *Nucleic Acids Research*, 46  
721 (W1):W95–W101, May 2018.

722 Y. Zhou, L. Shearwin-Whyatt, J. Li, Z. Song, T. Hayakawa, D. Stevens, J. C. Fenelon, E. Peel,  
723 Y. Cheng, F. Pajpach, N. Bradley, H. Suzuki, M. Nikaido, J. Damas, T. Daish, T. Perry, Z. Zhu,  
724 Y. Geng, A. Rhie, Y. Sims, J. Wood, B. Haase, J. Mountcastle, O. Fedrigo, Q. Li, H. Yang, J. Wang,  
725 S. D. Johnston, A. M. Phillippy, K. Howe, E. D. Jarvis, O. A. Ryder, H. Kaessmann, P. Donnelly,  
726 J. Korlach, H. A. Lewin, J. Graves, K. Belov, M. B. Renfree, F. Grützner, Q. Zhou, and G. Zhang.  
727 Platypus and echidna genomes reveal mammalian biology and evolution. *Nature*, pages 1–31, Apr.  
728 2021.

## 729 **Data and Code Availability**

730 Supplemental Data 1-7 and the EukMetaSanity-generated gene, protein, and repeat predictions for all  
731 NCBI reference genomes and MAGs are hosted through figshare. Supplemental Data 1-7: <https://doi.org/10.6084/m9.figshare.15044334>; NCBI genomes: <https://doi.org/10.6084/m9.figshare.15040554>; fungal genomes with depleted databases: <https://doi.org/10.6084/m9.figshare.15042633>; Delmont *et al.* (2021): <https://doi.org/10.6084/m9.figshare.15042645>;  
732 <https://doi.org/10.6084/m9.figshare.15042636>. EukMetaSanity  
733 and accompanying code is available at <https://github.com/cjneely10/EukMetaSanity>. Euk-  
734 MetaSanity is licensed through the GNU General Public License v3.0. And yapim, the API used to  
735 construct the steps in EukMetaSanity, can be found at <https://github.com/cjneely10/YAPIM>.  
736 yapim is licensed through the Creative Commons Attribution-Non Commercial 4.0 International Li-  
737 cense.  
738  
739  
740

## 741 **Acknowledgements**

742 The authors would like to thank the staff that support their respective HPC systems: Poseidon at the  
743 Woods Hole Oceanographic Institution, Discovery at the University of Southern California Center for  
744 Advanced Research Computing, and Endeavor in the USC Quantitative and Computational Biology  
745 Department. The authors would also like to thank the *Tara* Oceans consortium for providing open  
746 access to their expansive "omics" datasets and other researchers who embrace rapid and open access  
747 to their data. SKH was supported by a Postdoctoral Fellowship from the Center for Dark Energy  
748 Biosphere Investigations (C-DEBI) through NSF-OCE-0939564 and by NSF-OCE-1947776. HA was  
749 supported by NSF-OCE-1948025 and a WHOI Independent Research and Development award. BJT  
750 was supported by C-DEBI through NSF-OCE-0939654. This is C-DEBI Contribution XXX.

## 751 **Author contributions statement**

752 B.J.T., H.A., and C.J.N. conceived of and designed the study; C.J.N. wrote the code, performed  
753 the analyses, and analyzed the data; H.A. performed additional tests; B.J.T. and C.J.N. wrote the  
754 manuscript; S.K.H. provided expertise on database construction and usage; S.K.H. and H.A. provided  
755 edits to the manuscript. All authors reviewed the manuscript.



## 756 **Ethics Declaration**

757 The authors declare no conflicts of interest.
